# Supplementary material
Source: publisher figshare collection journal article supplement (https://diabetesjournals.figshare.com/articles/dataset/_/22898705)
Supplement: Supplementary file 3 [file 1]

# Protective *Renalase*-deficiency in beta cells shapes immune metabolism and function in autoimmune diabetes

Kevin Bode, Tara MacDonald, Taylor Stewart, Bryhan Mendez, Erica P. Cai, Noelle Morrow, Yu-Chi Lee, Peng Yi, Stephan Kissler

## Supplemental Figure Legends

### **Supplemental Figure 1: Comparison of immune cells in WT NIT-1 grafts, spleen and pancreas after adoptive transfer of diabetogenic splenocytes.**

NIT-1 WT cells ( $1.5 \times 10^7$ ) were injected s.c. in the left flank of NOD.scid mice, followed by i.v. injection of diabetogenic splenocytes 4 days (d) later. Grafts, spleen and pancreas were digested with collagenase D and DNase I. Single cell suspensions were stained for the indicated surface markers and analyzed by flow cytometry. **(a, b)** Immune cell populations from the indicated tissue obtained at d10 **(a)** or d17 **(b)** after splenocyte transfer. **(c-d)** Analysis of T cell activation markers. Summary data is shown in **c**, representative contour plots are shown in **d**. Results represent the mean  $\pm$  SD of four biological replicates.

### **Supplemental Figure 2: Characterization of immune cells isolated from WT or *Rnls* NIT-1 grafts, from their respective draining lymph nodes (dLN) and from the pancreas at different time points after adoptive transfer of diabetogenic splenocytes.**

WT or *Rnls* mutant NIT-1 cells ( $1.5 \times 10^7$ ) were injected s.c. in opposite flanks of NOD.scid mice, followed by i.v. injection of diabetogenic splenocytes 4 days later. Grafts, whole pancreas or inguinal dLN were analysed by flow cytometry at d10 (early) or d17 (late) **(a)** Quantification of graft weight from paired WT and RNLS-deficient grafts isolated at d10. Note that graft destruction in this particular experiment was not as pronounced at d10 as in the experiment shown in Figure 2. **(b)** Quantification of the indicated immune cell subpopulations within 6 paired grafts at d10. **(c)** Quantification of the indicated immune cell subpopulations within dLN at d17. **(d)** Comparison of the indicated immune cell subpopulations in paired WT and *Rnls*-deficient NIT-1 grafts and pancreas at d17. **(e-f)** Mean fluorescence intensity (MFI) of MHC class II surface expression on antigen presenting cells (APC, **e**) or macrophages (**f**) in NIT-1 grafts at d10 and d17. Results represent the mean of six **(a, b, e and f)** or four **(c and d)** paired biological replicates. \*  $p < 0.05$ , \*\*  $p < 0.01$ , \*\*\*  $p < 0.001$  (multiple paired or unpaired, two-tailed t-test **(a,b,c,e,f)**, or one-way ANOVA analysis **(d)**).

### **Supplemental Figure 3: *Rnls*-deficient beta cell grafts harbor a similar composition of infiltrating immune cells but are enriched for adipose-tissue (AT)-like macrophages (M $\phi$ cluster 2) compared with WT grafts. **(a)** Representative contour plot of FACS-sorted CD45 positive and propidium iodide (PI) negative immune cells used in 3' gene expression single cell RNA sequencing (scRNAseq) approach. **(b)** UMAP showing the distribution of late graft-infiltrated immune cell subpopulations within all RNLS-deficient (top) or WT (bottom) grafts.**

(c) Immunological Genome Project (ImmGen ULI RNA-Seq data base) geneset enrichment analysis of the 20 most upregulated genes in M $\phi$  cluster 2 compared to indicated MF subsets. Squares show low (blue), intermediate (white to pink) or high (yellow to orange) gene expression of indicated subsets. (d) Reactome analysis of AT-M $\phi$  cluster 2 identified by scRNAseq analysis at d17 showing the 10 most significantly upregulated pathways ( $-\log_{10}(\text{FDR}) \geq 2$ ).

**Supplemental Figure 4: CD4<sup>+</sup> T cell cluster 0 is characterized by a distinct anti-inflammatory gene expression profile.** Gene expression profile analysis was performed by geneset enrichment analysis of the 30 most upregulated genes in CD4<sup>+</sup> T cell cluster 0 compared to the indicated  $\alpha\beta$  T cell populations from the Immunological Genome Project (ImmGen ULI RNA-Seq data base). Squares denote low (blue), intermediate (white to pink) or high (yellow to orange) gene expression.

**Supplemental Figure 5: Dendritic cell (DC) clusters 17 and 25 are characterized by an inflammatory gene expression profile.** Hallmark gene expression analysis of (a) DC cluster 17 identified as conventional DC subtype 2 (cDC2) and (b) DC cluster 25 identified as plasmacytoid DC (pDC) subset derived from single cell RNA sequencing (scRNAseq) showing the 10 most significantly upregulated pathways.
