# Supplementary material
Source: publisher figshare collection journal article supplement (https://diabetesjournals.figshare.com/articles/dataset/_/22898705)

# Supplemental Figure 5

**a**

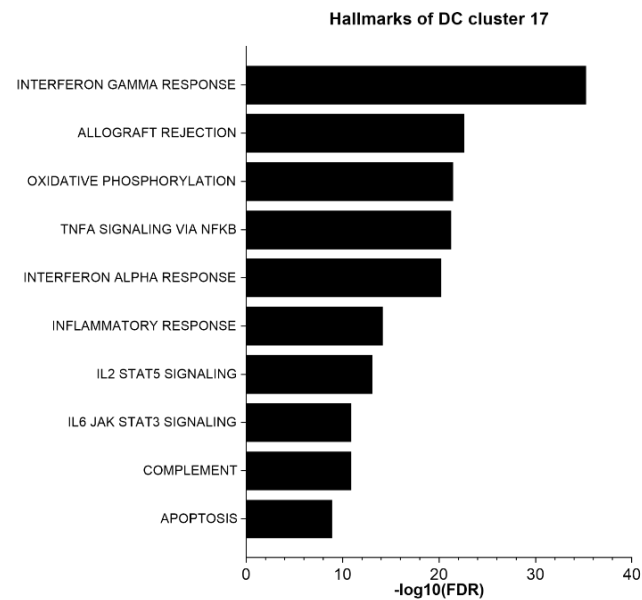

**b**

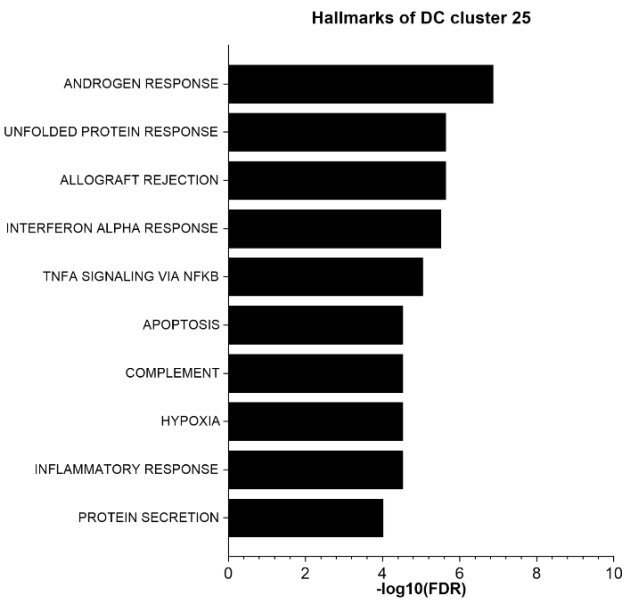

Supplement: Supplementary file 1 [file 1]

# Supplemental Figure 1

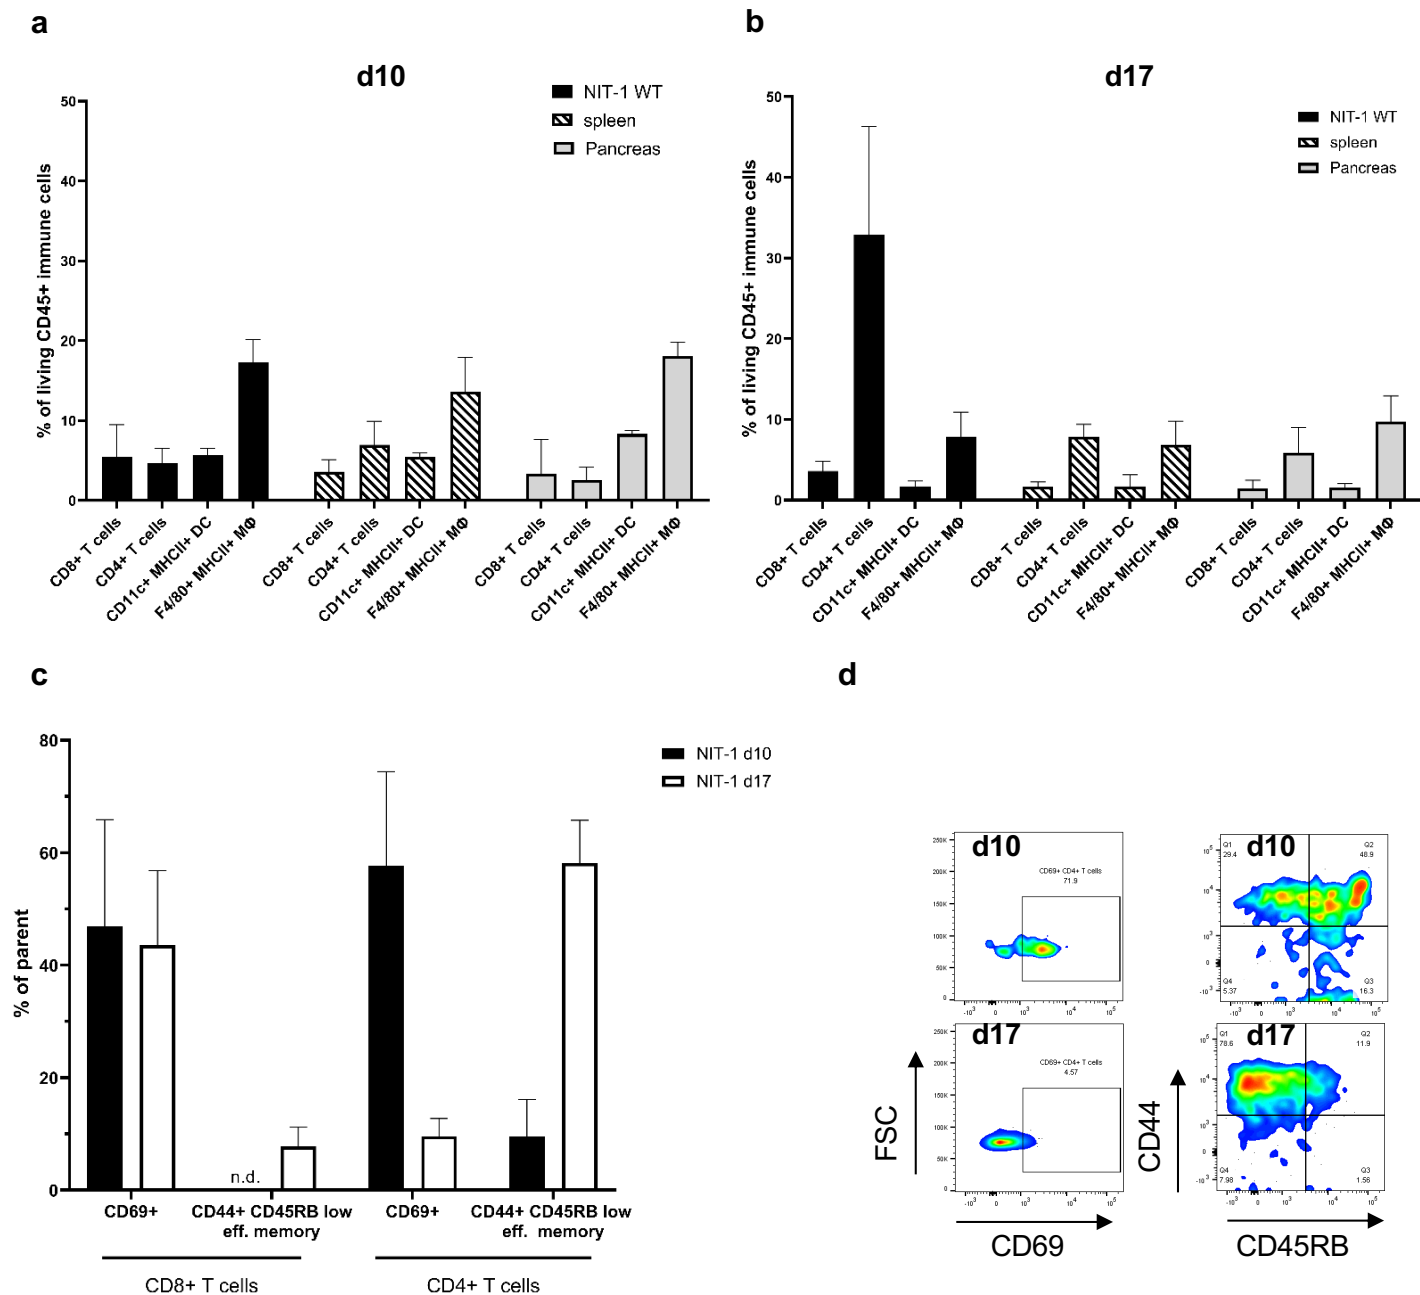

Supplement: Supplementary file 2 [file 1]

Supplemental Figure 3

c

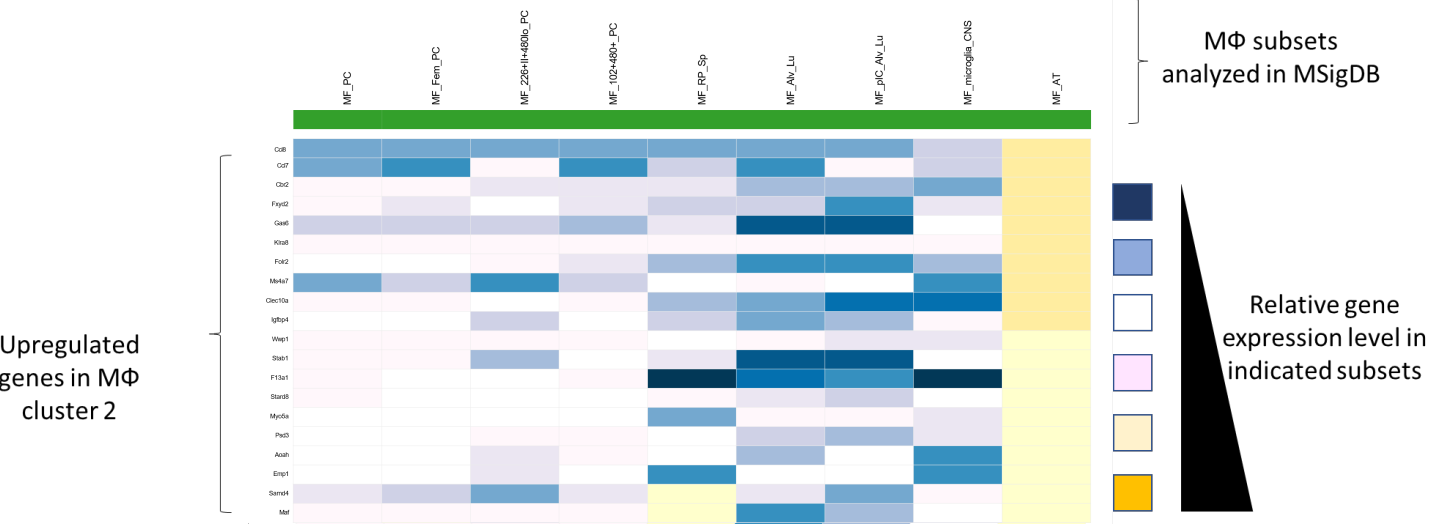

b

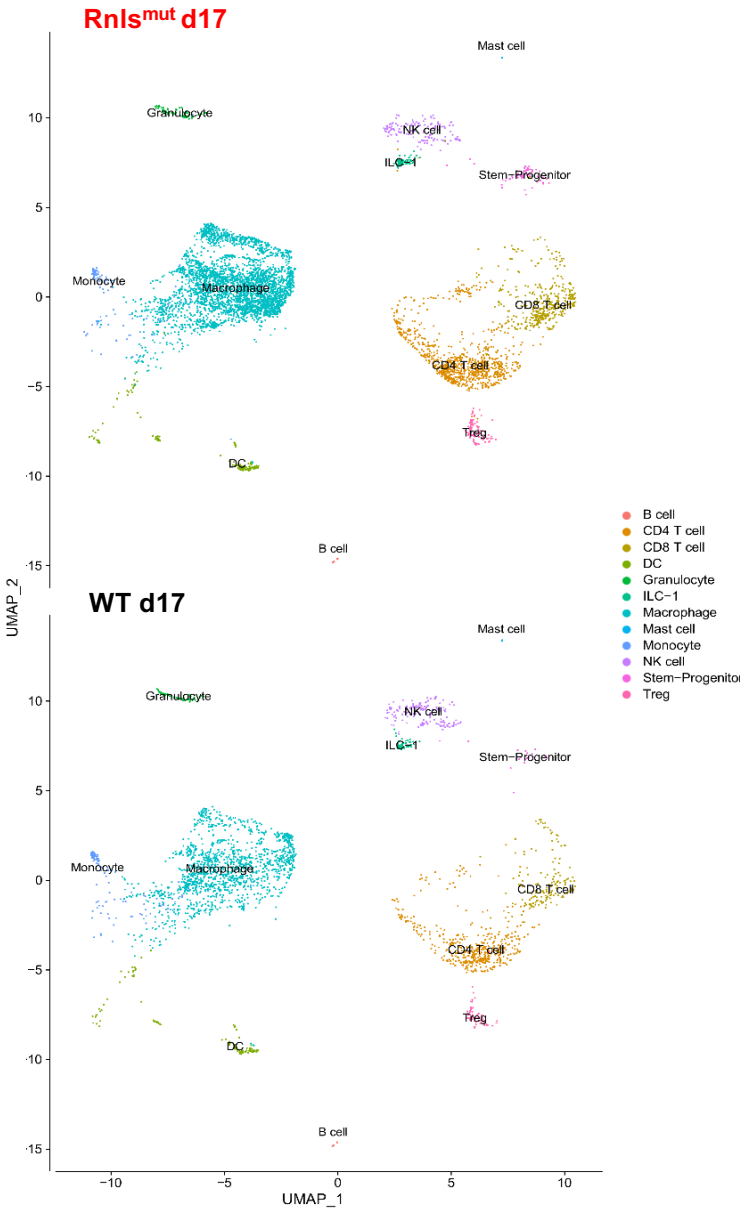

a

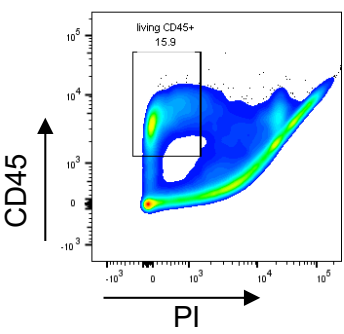

d

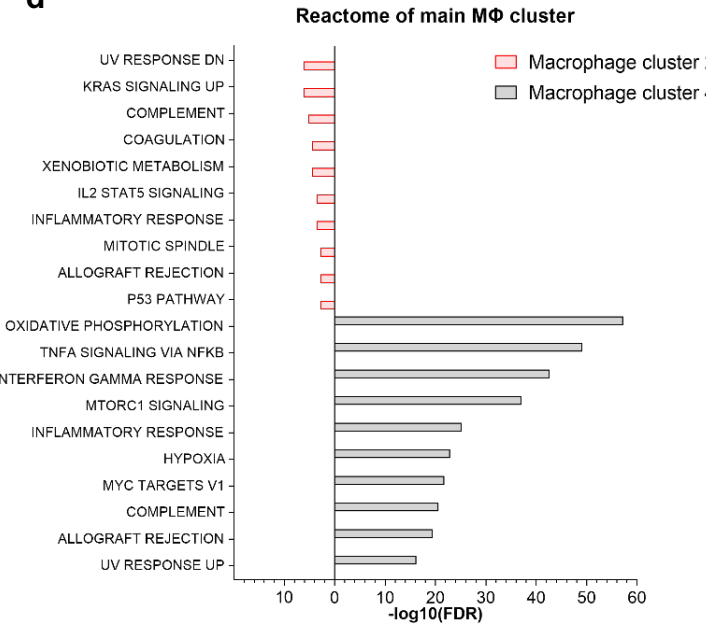

Supplement: Supplementary file 4 [file 1]

## Supplemental Figure 2

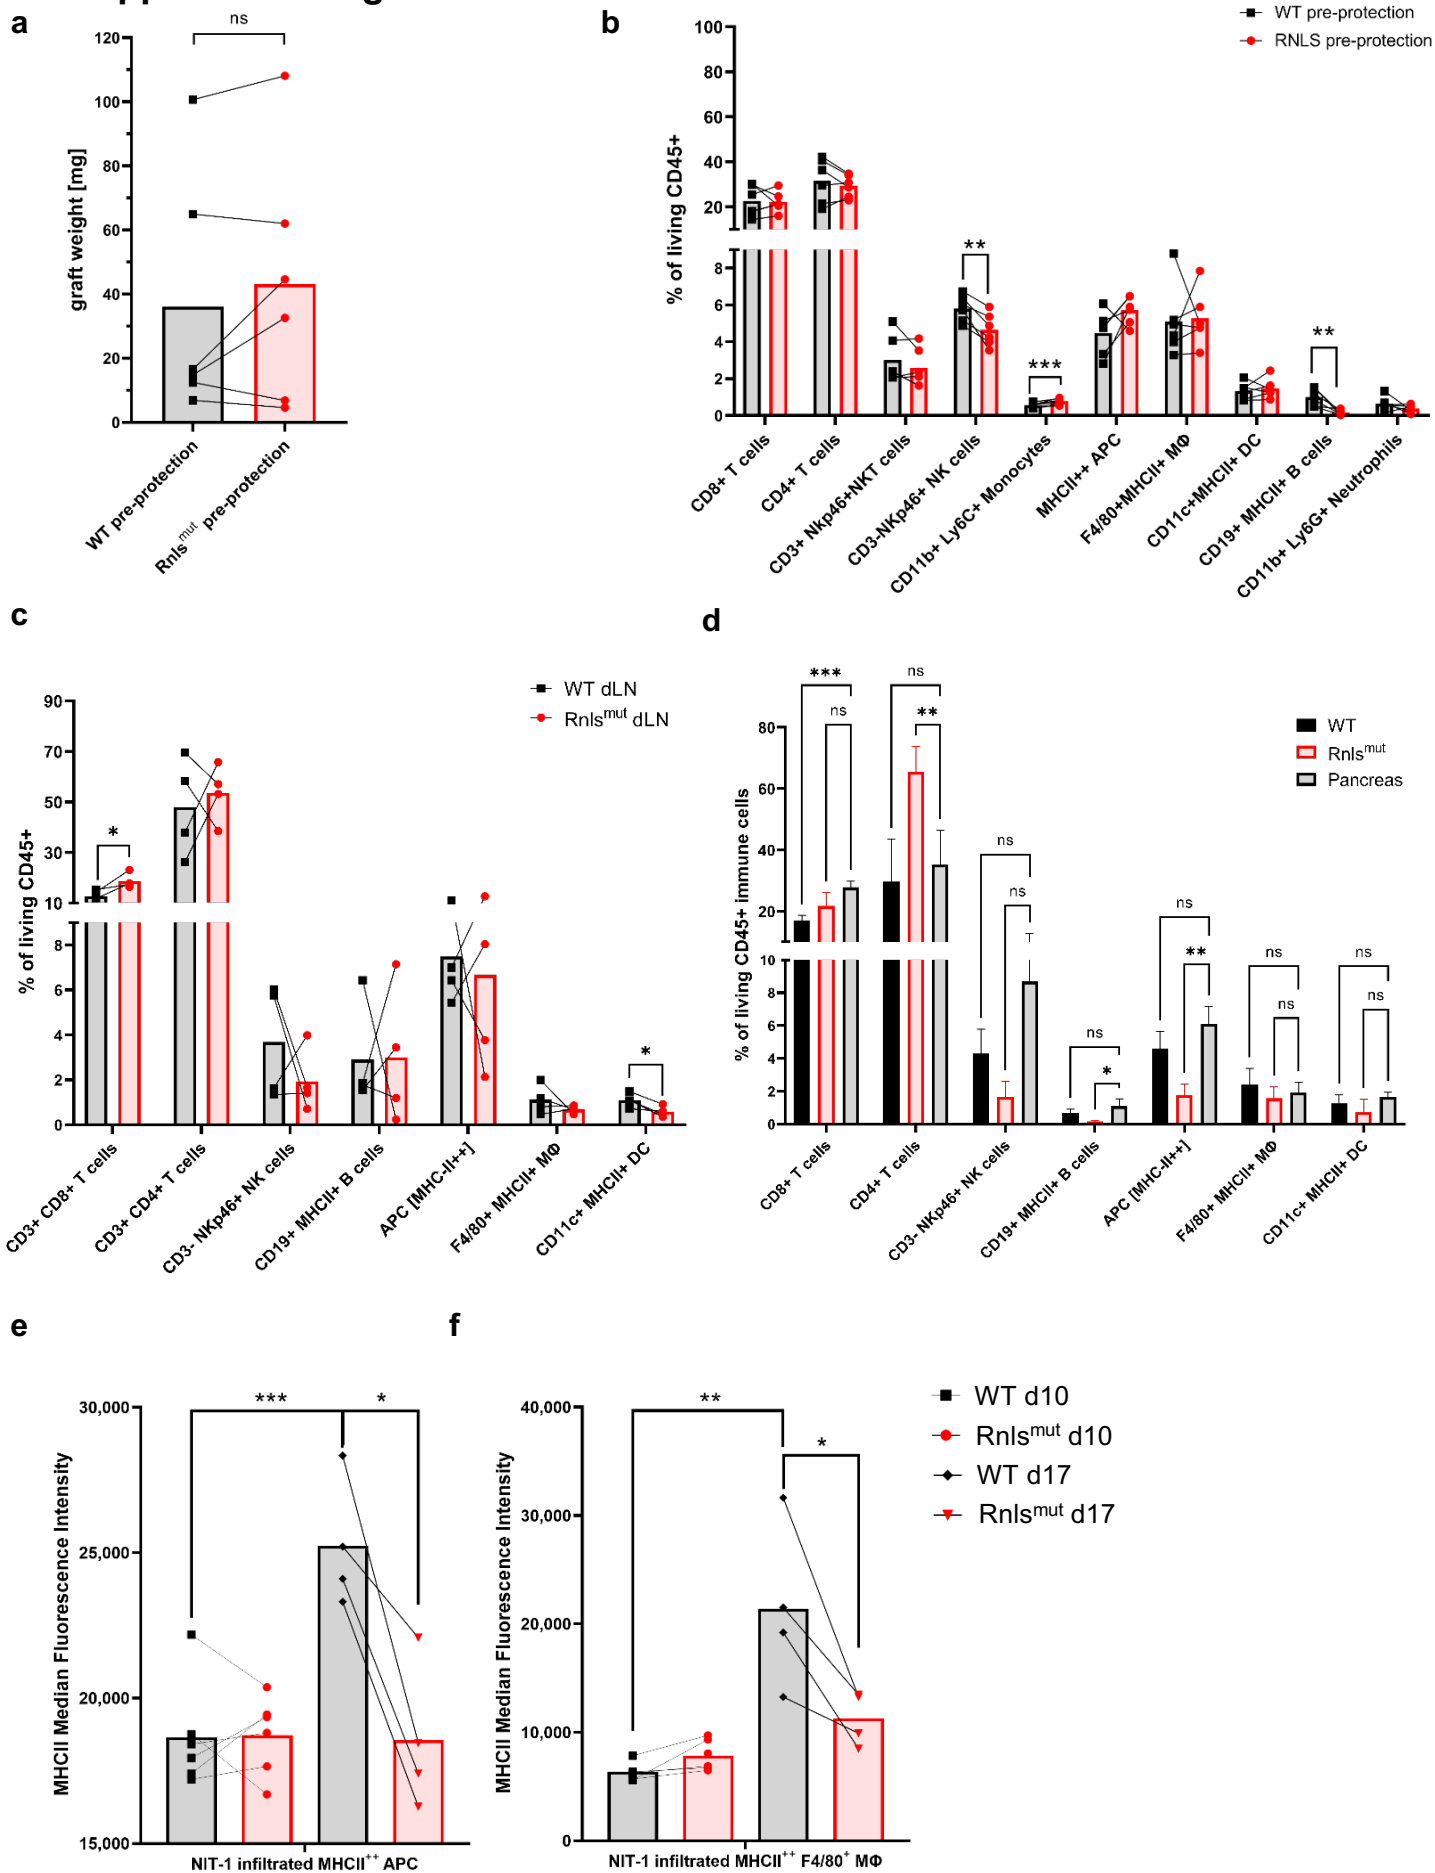

Supplement: Supplementary file 5 [file 1]

Supplemental Figure 4

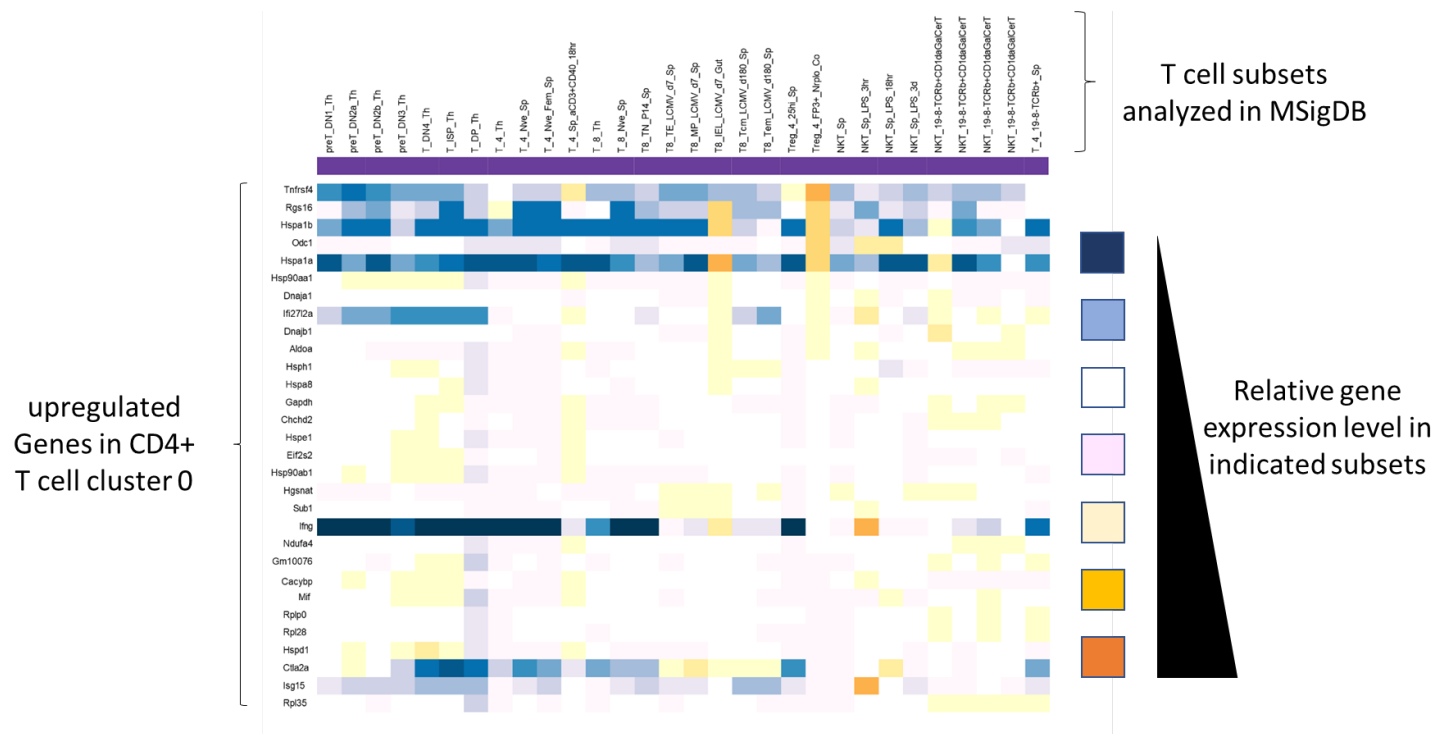

Supplement: Supplementary file 6 [file 1]
